**A-677 Room 220-222, 10/17/2000 3:30 PM - 5:00 PM (PD)**  
**Changes in Cerebral Microcirculation after the Release of Aortic Clamp in Rabbits** Masayoshi Uchida, MD; Hiroki Iida, MD; Mami Iida, MD; Shuji Dobi, MD, Department of Anesthesiology, Gifu University School of Medicine, Gifu City, Gifu, Japan. Since cerebral pial vasoconstriction following aortic declamping is attenuated by serotodast, it could be induced by  $\text{TxA}_2$ .

### Experimental Circulation: Preconditioning & Potassium Channels

**A-678 Room 309, 10/18/2000 2:00 PM - 3:30 PM (PD)**  
**Effect of Isoflurane on PKC Activated KATP Channel: Implications for Anesthetic Preconditioning** Kazubiro Fujimoto, MD, PhD; Zeljko J. Bosnjak, PhD; Wai-Meng Kwok, PhD, Anesthesiology, Medical College of Wisconsin, Milwaukee, WI, United States. Isoflurane modulates PKC activated KATP channel via an intracellular mechanism.

**A-679 Room 309, 10/18/2000 2:00 PM - 3:30 PM (PD)**  
**Sevoflurane Pre-treatment Improves Function and Reduces Formation of Peroxynitrite after Global Ischemia in Isolated Hearts** Enis Novalija, MD; Jianzhong An, MD; Amadou Camara, PhD; Srinivasan G. Varadarajan, MD, PhD; David F. Stowe, MD, PhD, Anesthesiology, Medical College of Wisconsin, Milwaukee, WI, United States. Sevoflurane pre-treatment improves function and reduces peroxynitrite after ischemia.

**A-680 Room 309, 10/18/2000 2:00 PM - 3:30 PM (PD)**  
**Diabetes and Acute Hyperglycemia Abolish Mitochondrial  $\text{K}_{\text{ATP}}$  Channel-Induced Cardioprotection *In Vivo*** Judy R. Kersten, MD; Wolfgang G. Toller, MD; Paul S. Pagel, MD PhD; David C. Warltier, MD PhD, Department of Anesthesiology, Medical College of Wisconsin, Milwaukee, WI, United States. Diazoxide does not reduce myocardial infarct size in diabetic or hyperglycemic dogs.

**A-681 Room 309, 10/18/2000 2:00 PM - 3:30 PM (PD)**  
**Role of Mitochondrial KATP and Stretch-Activated Channels in Isoflurane-Induced Preconditioning** Vincent Piriou, MD, PhD; Pascal Chiari, MD; Jean Neidecker, MD; Michel Ovize, MD, PhD; Jean-Jacques Lehot, MD, PhD, EA 1896. Anesthésie-Reanimation, Hôpital Cardiovasculaire Louis Pradel, Lyon, France. We showed that 5-hydroxydecanoate and gadolinium antagonized isoflurane-induced preconditioning.

**A-682 Room 309, 10/18/2000 2:00 PM - 3:30 PM (PD)**  
**Chronic Intermittent Consumption of Low Doses of Ethanol Reduces Experimental Myocardial Infarct Size by  $\text{K}_{\text{ATP}}$  Channel Activation in Dogs** Paul S. Pagel, MD PhD; Wolfgang G. Toller, MD; Eric R. Gross, BS; Judy R. Kersten, MD; David C. Warltier, MD PhD, Anesthesiology, Medicine, and Pharmacology, Medical College of Wisconsin, Milwaukee, WI, United States. Ethanol reduces infarct size by activating  $\text{K}_{\text{ATP}}$  channels

**A-683 Room 309, 10/18/2000 2:00 PM - 3:30 PM (PD)**  
**Isoflurane Sensitizes the Cloned Pancreatic KATP Channel to Diazoxide** Anna Stadnicka, PhD; Wai-Meng Kwok, PhD; Zeljko J. Bosnjak, PhD, Anesthesiology, Medical College of Wisconsin, Milwaukee, WI, United States. Isoflurane inhibits current through cloned pancreatic KATP channels expressed transiently in HEK293 cells, and sensitizes the channel to diazoxide.

**A-684 Room 309, 10/18/2000 2:00 PM - 3:30 PM (PD)**  
**Remote Preconditioning Improves Lung Function after Repeated Coronary Artery Occlusion and Reperfusion** Zhengyuan Xia, MD; Paul Herijgers, MD, PhD; P. Wouters, MD, PhD; T. Nishida, MD, PhD; V. Leumens, Center for Experimental Surgery and Anesthesiology, Catholic University of Leuven, Leuven, Belgium. RPC improves lung gas exchange after repeated coronary artery occlusion and reperfusion.

**A-685 Room 309, 10/18/2000 2:00 PM - 3:30 PM (PD)**  
**Ischemic Preconditioning of the Kidney Does Not Result in Alterations of Reperfusion Blood Flow in a Rat Model of Ischemic Reperfusion Injury** Dwight D. Deal, B.S.; Jason C. Vernon, B.S.; James Zboyovski, B.S.; David M. Colonna, M.D.; David A. Zvara, M.D., Dept. of Anesthesiology, Wake Forest Univ. Sch. of Med., Winston-Salem, NC, United States. Ischemic preconditioning does not alter reperfusion renal blood flow.
